# Supplementary material
Source: Springer Nature journal article supplement (https://www.springermedizin.de/resource/supplementary/13075_2013_4129_MOESM4_ESM.pdf/9696118)
Supplement: MOESM4 [file 9696118]

**Question 1**

|                                                                  | <b>Treatment A</b> | <b>Treatment B</b> |
|------------------------------------------------------------------|--------------------|--------------------|
| Efficacy (their effect) in reducing the risk of future fractures | 30%                | 40%                |
| Possible side effects (affecting 1 in 50 patients)               | Flu-like symptoms  | Skin reactions     |
| Mode of administration                                           | Subcutaneous       | Intravenous        |
| Frequency of administration                                      | 3-month            | Yearly             |
| Cost to you                                                      | €15 (per month)    | €25 (per month)    |

Which treatment would you choose?

Treatment A

Treatment B

No treatment

*(Tick one box only)*
